# Supplementary material for: Photocatalytic degradation of the antibiotic levofloxacin using highly crystalline TiO2 nanoparticles
Source: Royal Society of Chemistry journal article supplement (doi:10.1039/c3nj01619f), 2014-01-01
Supplement: c3nj01619f1.pdf [file c3nj01619f1.pdf]

**Supporting information**

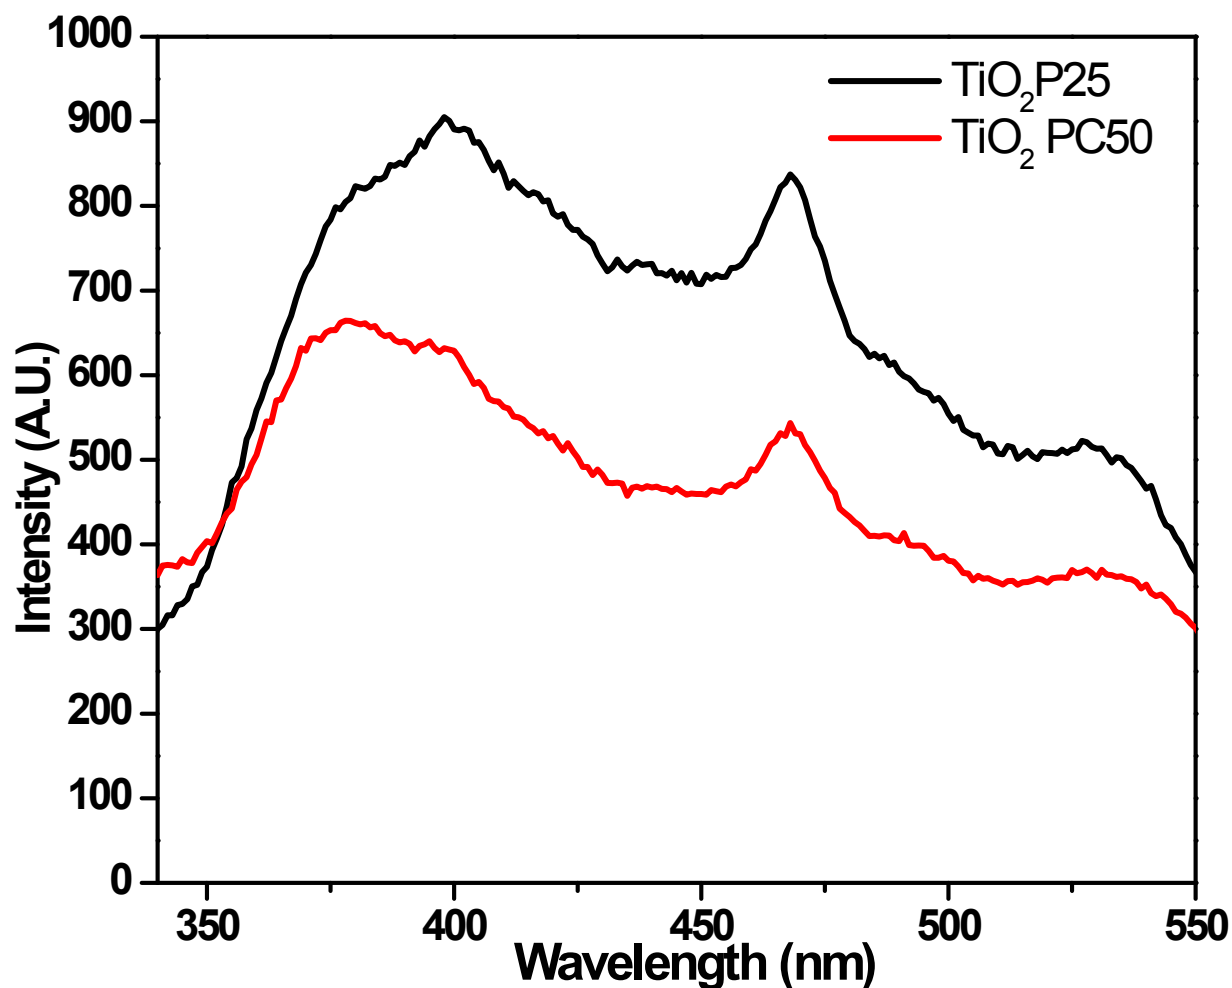

**Figure S1:** Room temperature photoluminescence spectra of TiO<sub>2</sub> PC

50 and TiO<sub>2</sub> P25 at an excitation wavelength of 290 nm.

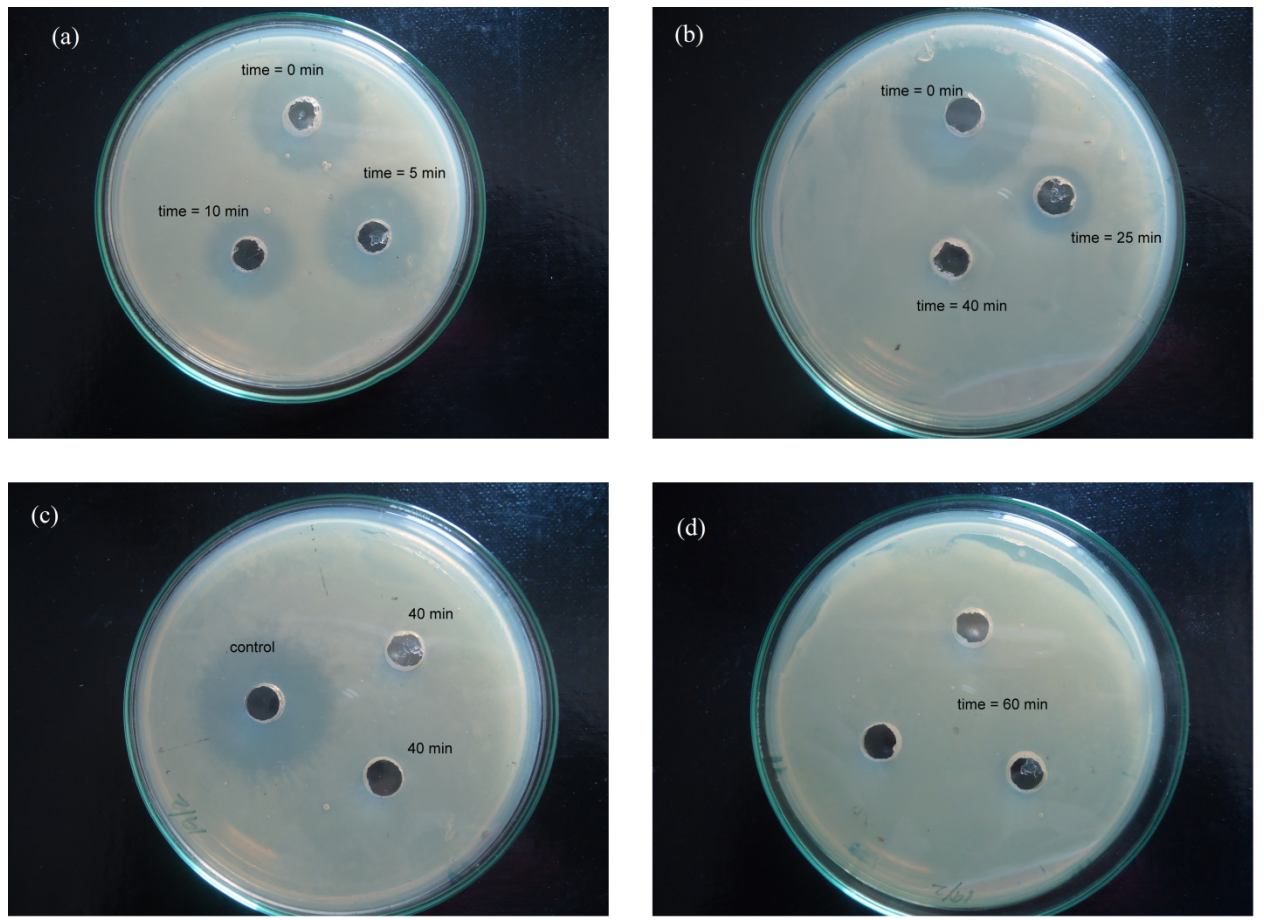

**Figure S2:** (a)-(d) *E. coli* inhibition zone around the micro drops (25  $\mu$ L) sample of treated water on the agar plate
